# Supplementary material for: StenM_174: A Novel Podophage That Infects a Wide Range of Stenotrophomonas spp. and Suggests a New Subfamily in the Family Autographiviridae
Source: Viruses. 2023 Dec 21;16(1):18. doi: 10.3390/v16010018 (PMC10820202; doi:10.3390/v16010018)
Supplement: Supplementary file 1 [file viruses-16-00018-s001.zip]

Archive with 6 entries (6 files):
- Figure S3.pdf
- Data S1.xlsx
- Data S2.pdf
- Data S3.pdf
- Figure S1.pdf
- Figure S2.pdf
