# Supplementary figures and images for: StenM_174: A Novel Podophage That Infects a Wide Range of Stenotrophomonas spp. and Suggests a New Subfamily in the Family Autographiviridae
Source: MDPI journal article supplement (doi:10.3390/v16010018), 2023-12-21

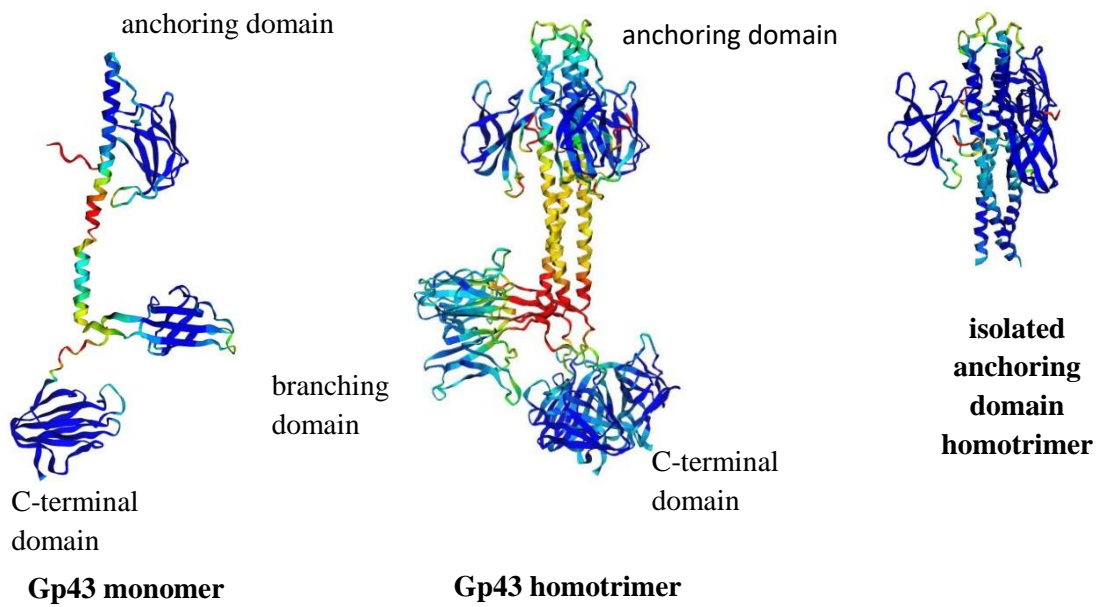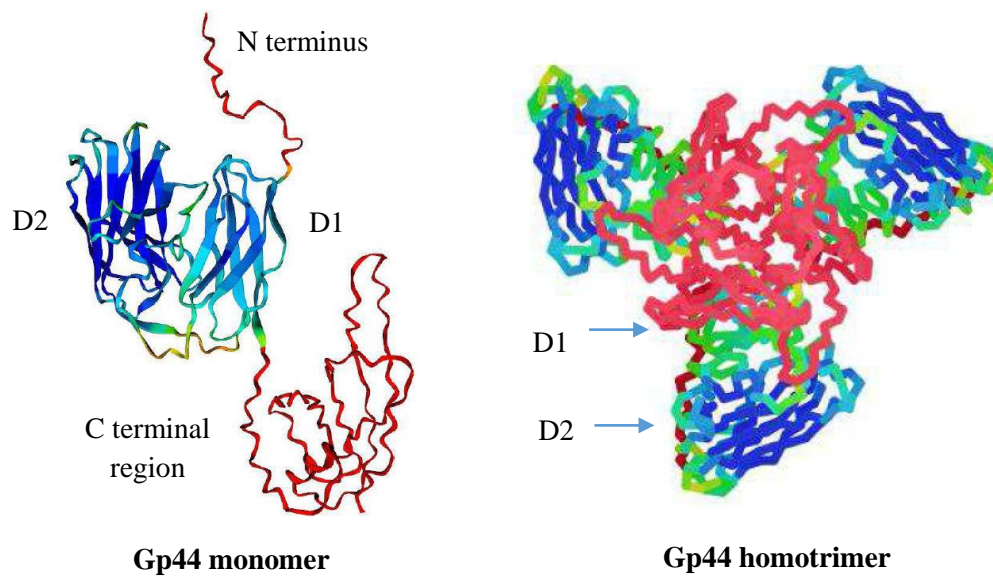

pI/DDT: ■ Very low (<50) ■ Low (60) ■ OK (70) ■ Confident (80) ■ Very high (>90)

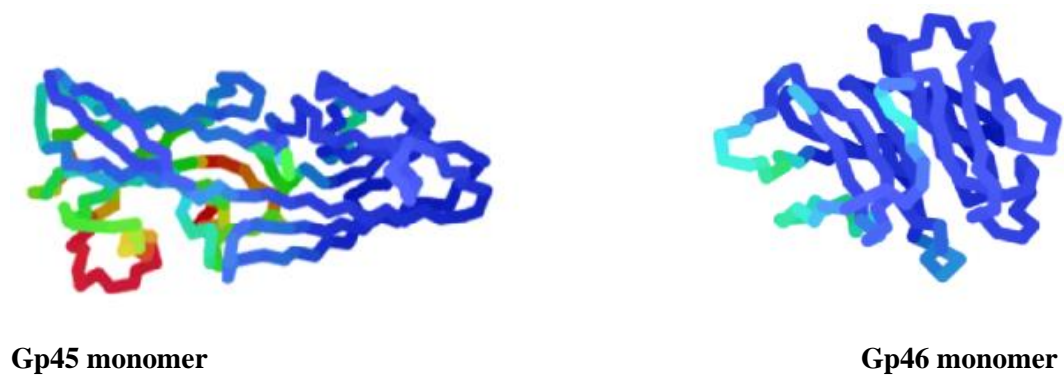

Supplement: s1 [file s1]

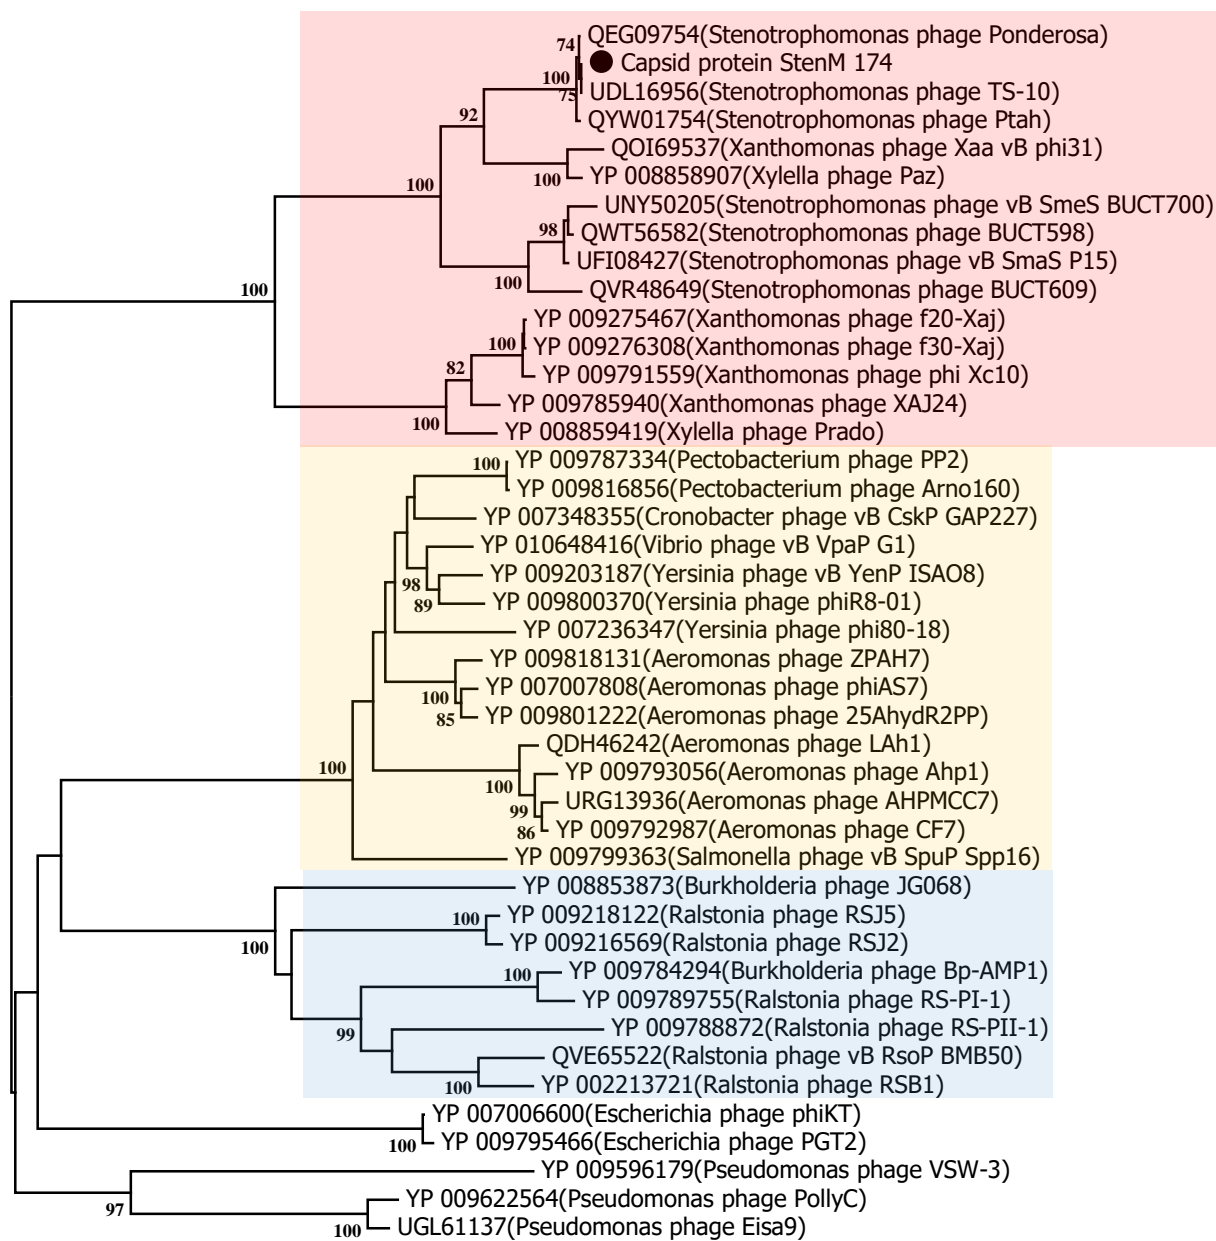

Supplement: s1 [file s1]

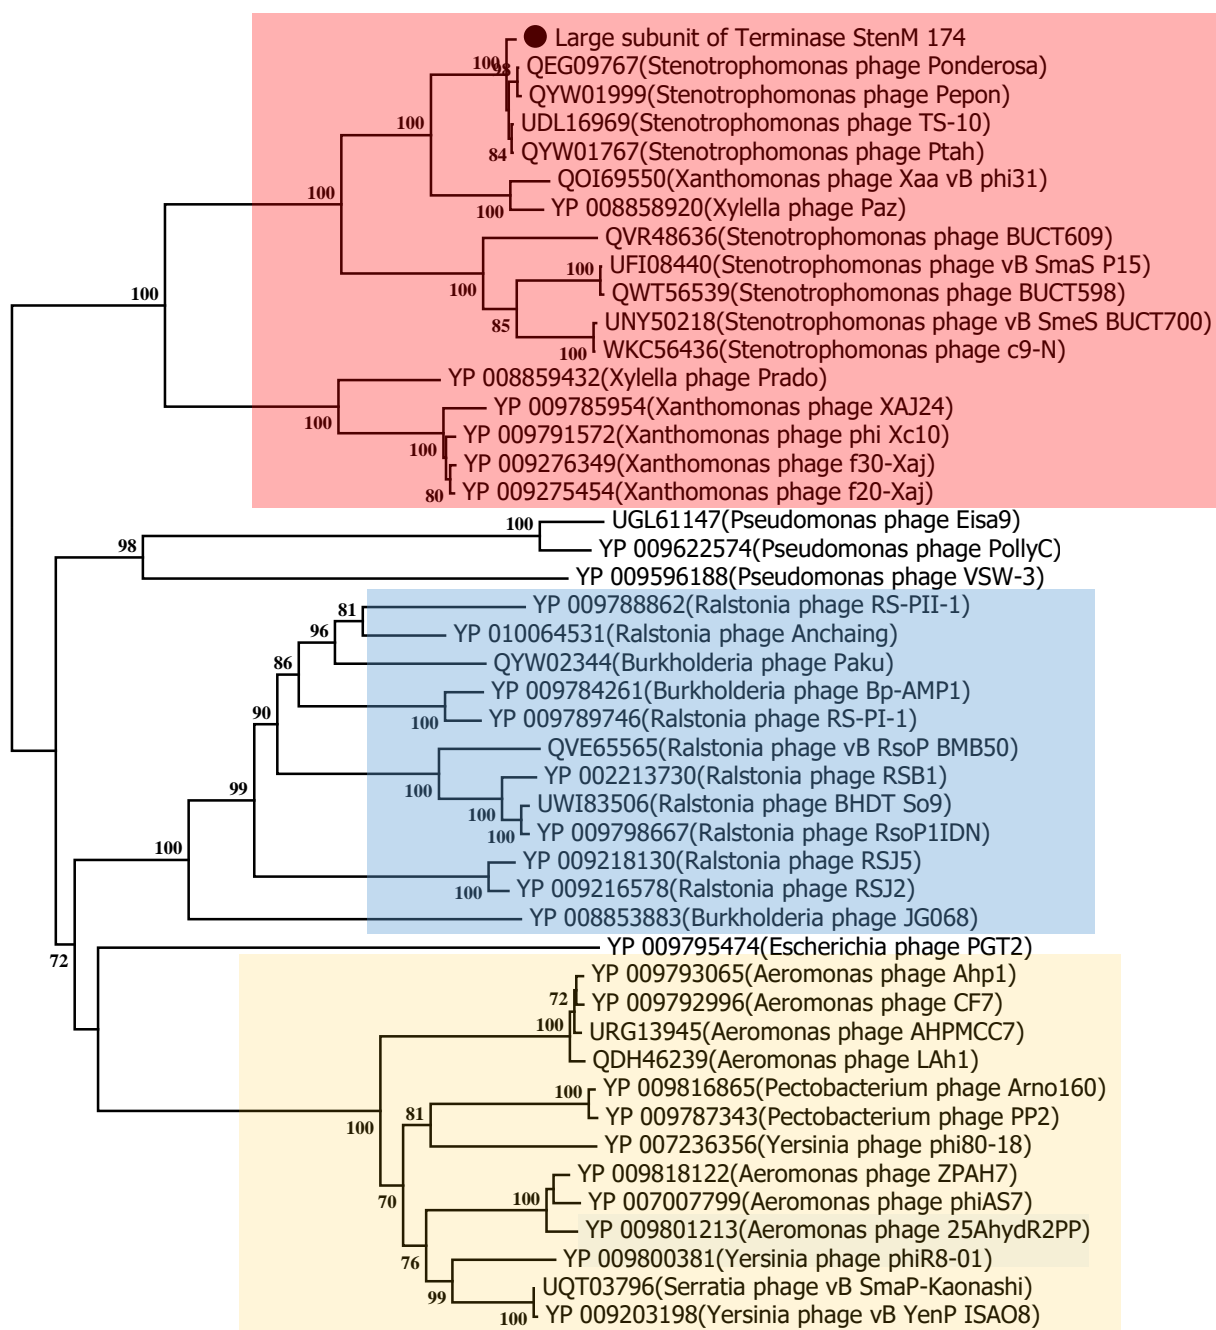

0.1

Supplement: s1 [file s1]

SignalP 6.0 prediction: Sequence

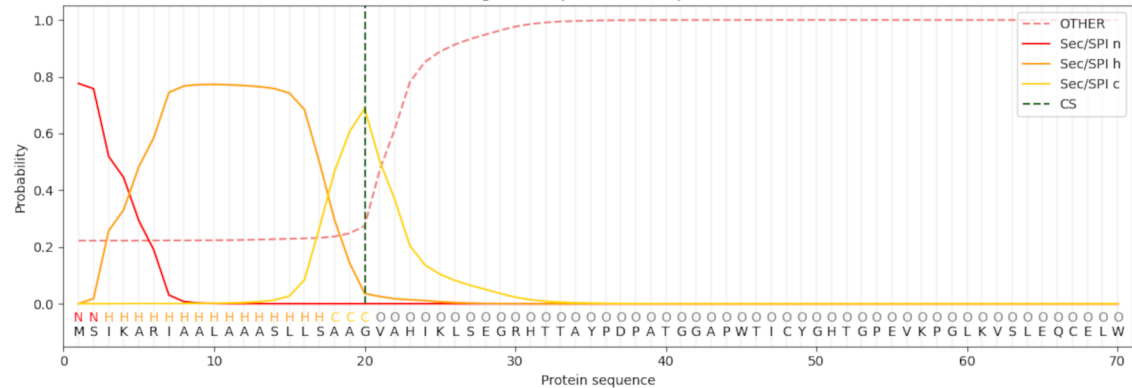

Supplement: s1 [file s1]
